# Supplementary material for: Effect of Luminance and Contrast Variation on Stereoacuity Measurements Using Smartphone Technology
Source: J Ophthalmol. 2021 Dec 23;2021:5258782. doi: 10.1155/2021/5258782 (PMC8718285; doi:10.1155/2021/5258782)
Supplement: Supplementary Materials — Test results of stereopsis (Supplementary table). [file 5258782.f1.zip]

Archive with 8 entries (8 files):
- 5258782.f1/Supplementary table 1.docx
- 5258782.f1/Supplementary table 2.docx
- 5258782.f1/Supplementary table 3.docx
- 5258782.f1/Supplementary table 4.docx
- 5258782.f1/Supplementary table 5.docx
- 5258782.f1/Supplementary table 6.docx
- 5258782.f1/Supplementary table 7.docx
- 5258782.f1/Supplementary table 8.docx
